# Supplementary material
Source: Elsevier journal article supplement (https://www.sciencedirect.com/science/article/pii/S1885585716304376)
Supplement: mmc1 [file S1885585716304376:mmc1.pdf]

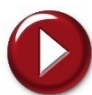

## Material suplementario

---

### Resultado del cierre incompleto de defecto tipo Gerbode con coil Nit-Occlud Lê VSD: hemolisis grave que precisa reintervención

---

#### LEYENDAS DE LOS VÍDEOS

**Vídeo 1A.** Defecto tipo Gerbode en ecocardiograma transesofágico: cortocircuito entre el ventrículo izquierdo y la aurícula derecha. Regurgitación tricuspídea significativa.

**Vídeo 1B.** Defecto tipo Gerbode en ventriculografía: chorro importante entre el tracto de salida del ventrículo izquierdo y la aurícula derecha.

**Vídeo 2A.** Resultado tras la colocación del primer dispositivo.

**Vídeo 2B.** Resultado final del primer procedimiento tras liberar ambos dispositivos.

**Vídeo 3A.** Estado del defecto residual en segundo procedimiento: similar al observado al final del primer procedimiento.

**Vídeo 3B.** Colocación del dispositivo Amplatzer VSD: aún persiste ligero cortocircuito.

**Vídeo 3C.** Resultado final del segundo procedimiento: mínimo cortocircuito por ventriculografía.

**Vídeo 3D.** Resultado final en ecocardiograma: regurgitación tricuspídea, sin datos de cortocircuito residual.
